# Supplementary material for: Mifepristone Increases Life Span of Virgin Female Drosophila on Regular and High-fat Diet Without Reducing Food Intake
Source: Frontiers journal article supplement (doi:10.3389/fgene.2021.751647), 2021-09-24
Supplement: Data_Sheet_5.pdf [file Data_Sheet_5.pdf]

## Supplemental Figure legends

**Figure S1.** Food intake assayed using EX-Q for individual experiments. Data is presented as mean  $\pm$  SD of 4 replicates of 10 flies each. For each media type, (-) drug is compared to mifepristone-treated group (M) using unpaired, two-sided t test, and p values are presented above the bars. The p value for significance with one comparison is 0.05. **(A, B)** Data for individual EX-Q assays of Figure 1 **(A)** Assay 1. **(B)** Assay 2. **(C, D)** Data for individual EX-Q assays of Figure 2. **(C)** Assay 1. **(D)** Assay 2. ANOVA analyses for the individual and combined assays is presented in Supplementary Table S2.

**Figure S2.** Effect of mifepristone on life span of virgin females on control diet, additional assays. Virgin females were assayed for life span on control media, in the absence (-) and presence (Mf) of 200 $\mu$ g/ml mifepristone. **(A)** Assay 1. **(B)** Assay 2. **(C)** Statistical summary for assays 1 and 2, including median life span and log-rank test results. (-) drug is compared to mifepristone-treated (Mf). The p value for significance with 1 comparisons is 0.05. **(D-F)** Food intake determined using EX-Q assay. (-) drug is compared to mifepristone-treated group (Mf) using unpaired, two-sided t test, and p values are presented above the bars. The p value for significance with one comparison is 0.05. **(D)** Combined data for assay 1 and assay 2. **(E)** Assay 1. **(F)** Assay 2.
