# Supplementary material for: Mifepristone Increases Life Span of Virgin Female Drosophila on Regular and High-fat Diet Without Reducing Food Intake
Source: Front Genet. 2021 Sep 24;12:751647. doi: 10.3389/fgene.2021.751647 (PMC8511958; doi:10.3389/fgene.2021.751647)
Supplement: Supplementary file 2 [file DataSheet4.xlsx]

## Sheet: Sheet1
virgin down					mated down					virgin up					mated up
Symbol	CG number	Name [tissue]	log2 fold change	P-value	Symbol	CG number	Name [tissue]	log2 fold change	P-value	Symbol	CG number	Name [tissue]	log2 fold change	P-value	Symbol	CG number	Name [tissue]	log2 fold change	P-value
BomBc1	CG15066	Bomanin Bicipital 1 [Head]	-1.36932	5e-05	Ag5r2	CG9540	Antigen 5-related 2	-0.718721	5e-05	Acbp6	CG15829	Acyl-CoA binding protein 6	2.32036	0.0002	CG10562	CG10562		0.759795	5e-05
BomS1	CG18108	Bomanin 1	-0.857709	5e-05	Alp8	CG3264	Alkaline phosphatase 8	-0.718202	5e-05	Alp8	CG3264	Alkaline phosphatase 8	1.71885	5e-05	CG10591	CG10591		2.10862	5e-05
BomS5	CG15065	Bomanin 23	-0.687851	0.0001	AttC	CG4740	Attacin-C	-1.02277	5e-05	CG10910	CG10910		0.589178	5e-05	CG1139	CG1139		0.953056	0.0002
CG13083	CG13083	[Chorion] [Ovary]	-0.611097	5e-05	BomBc1	CG15066	Bomanin Bicipital 1 [Head]	-0.822799	5e-05	CG11893	CG11893	[Midgut]	0.931607	5e-05	CG11893	CG11893	[Midgut]	1.11448	5e-05
CG13084	CG13084	[Chorion] [Ovary]	-0.774539	5e-05	CG10345	CG10345		-0.592117	0.00015	CG15533	CG15533	[predicted sphingomyelin phosphodiesterase] [Midgut]	0.84898	5e-05	CG12766	CG12766		0.972044	0.00055
CG15570	CG15570	[Chorion] [Ovary]	-0.729584	5e-05	CG1077	CG1077		-0.68118	5e-05	CG16775	CG16775		0.68565	5e-05	CG13947	CG13947		1.29205	5e-05
CG15571	CG15571	[Chorion] [Ovary]	-0.966872	0.00015	CG12716	CG12716		-1.74897	5e-05	CG17097	CG17097		1.61323	5e-05	CG14110	CG14110		1.92587	0.0001
CG31926	CG31926	[Chorion/renin ortholog] [Ovary]	-0.926375	5e-05	CG13083	CG13083	[Chorion] [Ovary]	-1.16327	5e-05	CG4563	CG4563		1.62889	5e-05	CG14756	CG14756		1.43512	0.00015
CG32642	CG32642	[Chorion] [Ovary]	-0.679092	5e-05	CG13084	CG13084	[Chorion] [Ovary]	-1.11831	5e-05	CG6830	CG6830	[Midgut]	0.809268	5e-05	CG15533	CG15533	[predicted sphingomyelin phosphodiesterase] [Midgut]	0.68417	5e-05
CG4757	CG4757		-0.782798	5e-05	CG13113	CG13113		-0.953903	5e-05	CG7298	CG7298		0.890359	0.0002	CG17108	CG17108		0.657937	5e-05
Cp18	CG6517	Chorion protein 18 [Ovary]	-0.585392	0.0002	CG14205	CG14205		-0.793593	5e-05	Cyp12a5	CG11821	Cyp12a5 [Midgut]	0.659046	5e-05	CG1979	CG1979		0.630378	5e-05
Cyp4d21	CG6730	Cyp4d21	-1.4256	5e-05	CG15570	CG15570	[Chorion] [Ovary]	-0.685905	5e-05	Cyp28a5	CG8864	Cyp28a5 [Midgut]	0.914903	5e-05	CG31104	CG31104		0.725782	5e-05
Femcoat	CG15573	Femcoat [Chorion] [Ovary]	-0.640263	5e-05	CG15571	CG15571	[Chorion] [Ovary]	-1.26988	0.0004	Cyp6a14	CG8687	Cyp6a14 [Head]	0.768224	5e-05	CG31730	CG31730		Inf	5e-05
Lsp1beta	CG4178	Larval serum protein 1 beta [Carcass]	-1.28305	5e-05	CG15721	CG15721		-0.648953	5e-05	Cyp6a21	CG10247	Cyp6a21 [Midgut]	0.660787	5e-05	CG33514	CG33514		0.737421	0.0001
Lsp2	CG6806	Larval serum protein 2	-0.754634	5e-05	CG16926	CG16926		-0.702044	0.00015	Cyp6a23	CG10242	Cyp6a23 [Midgut]	0.841835	5e-05	CG34040	CG34040		1.11976	5e-05
TotA	CG31509	Turandot A	-1.25915	5e-05	CG1698	CG1698		-0.828814	5e-05	Cyp9b2	CG4486	Cytochrome P450-9b2 [Crop]	0.804878	5e-05	CG4702	CG4702		2.26002	5e-05
TotC	CG31508	Turandot C	-1.24463	5e-05	CG17192	CG17192		-0.857303	5e-05	Drsl3	CG322283	Drosomycin-like 3	Inf	5e-05	CG6277	CG6277		1.08948	5e-05
TotM	CG14027	Turandot M	-3.23299	5e-05	CG17571	CG17571		-0.634079	5e-05	Jon66Ci	CG7118	Jonah 66Ci	1.36509	5e-05	CG6830	CG6830	[Midgut]	1.25724	5e-05
					CG31041	CG31041		-1.05108	5e-05	Mdr50	CG8523	Multi drug resistance 50 [Midgut]	1.14045	5e-05	CG6834	CG6834		0.617199	5e-05
					CG31324	CG31324		-0.761567	0.00025	peb	CG12212	pebbled	1.18021	0.0001	CG8093	CG8093		1.08049	5e-05
					CG31926	CG31926	[Chorion/renin ortholog] [Ovary]	-1.28324	5e-05	PGRP-SC1a	CG14746	Peptidoglycan recognition protein SC1a	3.91436	0.00015	Cht4	CG3986	Chitinase 4	0.83055	0.0001
					CG31928	CG31928		-0.915975	5e-05	PGRP-SC1b	CG8577	Peptidoglycan recognition protein SC1b	2.60464	5e-05	Cpr72Ec	CG4784	Cuticular protein 72Ec	0.690177	5e-05
					CG32642	CG32642	[Chorion] [Ovary]	-1.27048	5e-05	phu	CG8147	phurba tashi	1.0396	5e-05	Cyp12a5	CG11821	Cyp12a5 [Midgut]	1.07382	5e-05
					CG4009	CG4009		-0.588958	5e-05	pirk	CG15678	poor Imd response upon knock-in	2.47705	5e-05	Cyp28a5	CG8864	Cyp28a5 [Midgut]	1.18549	5e-05
					CG5246	CG5246		-0.720514	5e-05	RpL28	CG12740	Ribosomal protein L28	5.3061	5e-05	Cyp6a14	CG8687	Cyp6a14 [Head]	1.06283	5e-05
					CG5550	CG5550		-1.36554	5e-05	S-Lap1	CG6372	Sperm-Leucylaminopeptidase 1	1.23907	0.00015	Cyp6a21	CG10247	Cyp6a21 [Midgut]	0.638007	5e-05
					CG7227	CG7227		-0.739325	0.0004	Ugt37A2	CG5724	UDP-glycosyltransferase family 37 member A2 [Midgut]	1.42546	5e-05	Cyp6a23	CG10242	Cyp6a23 [Midgut]	1.03405	5e-05
					CG7298	CG7298		-0.991479	5e-05						Cyp9b2	CG4486	Cytochrome P450-9b2 [Crop]	0.799313	5e-05
					CG7631	CG7631		-0.881414	0.0002						Dop2R	CG33517	Dopamine 2-like receptor	1.17523	0.00015
					CG8785	CG8785		-1.07543	5e-05						GstZ2	CG9363	Glutathione S transferase Z2	0.642667	0.00025
					CNMa	CG13936	CNMamide	-1.34134	5e-05						ImpE2	CG1934	Ecdysone-inducible gene E2	1.86966	5e-05
					Cp15	CG6519	Chorion protein 15	-0.98511	5e-05						LManIII	CG9463	Lysosomal alpha-mannosidase III	1.3776	5e-05
					Cp16	CG6533	Chorion protein 16	-1.0501	5e-05						LManIV	CG9465	Lysosomal alpha-mannosidase IV	1.61945	5e-05
					Cp18	CG6517	Chorion protein 18 [Ovary]	-1.02361	5e-05						LManV	CG9466	Lysosomal alpha-mannosidase V	0.75572	5e-05
					Cp19	CG6524	Chorion protein 19	-0.982209	5e-05						LManVI	CG9468	Lysosomal alpha-mannosidase VI	0.744532	5e-05
					Cyp4e3	CG4105	Cytochrome P450-4e3	-1.585	5e-05						Mal-A3	CG8695	Maltase A3	0.74132	5e-05
					DptA	CG12763	Diptericin A	-2.7164	5e-05						Mal-A4	CG8693	Maltase A4	0.640545	5e-05
					DptB	CG10794	Diptericin B	-1.61293	5e-05						Mdr49	CG3879	Multi drug resistance 49	0.613481	5e-05
					Dro	CG10816	Drosocin	-1.49401	5e-05						Mdr50	CG8523	Multi drug resistance 50 [Midgut]	1.23658	5e-05
					Femcoat	CG15573	Femcoat [Chorion] [Ovary]	-1.24072	5e-05						ninaD	CG31783	neither inactivation nor afterpotential D	0.82378	5e-05
					Jon65Ai	CG10475	Jonah 65Ai	-0.910378	5e-05						nur	CG31813	nemuri	0.738268	0.00035
					Jon65Aii	CG6580	Jonah 65Aii	-0.605558	5e-05						PIG-Wb	CG18173	Phosphatidylinositol glycan anchor biosynthesis class W b	0.617862	0.00035
					Jon66Ci	CG7118	Jonah 66Ci	-0.841073	0.0005						Ptr	CG11212	Patched-related	1.04431	0.0002
					Lsp1beta	CG4178	Larval serum protein 1 beta [Carcass]	-1.74886	5e-05						Sodh-1	CG1982	Sorbitol dehydrogenase 1	0.630378	5e-05
					Npc2e	CG31410	Niemann-Pick type C-2e	-1.09687	5e-05						tinc	CG31247	tincar	0.744454	0.0005
					Obp99b	CG7592	Odorant-binding protein 99b	-0.854498	5e-05						TotA	CG31509	Turandot A	0.696516	5e-05
					PH4alphaPV	CG31015	prolyl-4-hydroxylase-alpha PV	-0.776116	5e-05						TotC	CG31508	Turandot C	1.29864	5e-05
					Rh5	CG5279	Rhodopsin 5	-0.663547	0.0004						Ugt35C1	CG6633	UDP-glycosyltransferase family 35 member C1	0.808491	5e-05
					vanin-like	CG32754	vanin-like	-0.906333	5e-05						Ugt37A2	CG5724	UDP-glycosyltransferase family 37 member A2 [Midgut]	1.9053	5e-05
															Ugt37D1	CG17932	UDP-glycosyltransferase family 37 member D1	0.644575	5e-05
															Unr	CG7015	Upstream of N-ras	0.630968	5e-05
