# Supplementary material for: Mifepristone Increases Life Span of Virgin Female Drosophila on Regular and High-fat Diet Without Reducing Food Intake
Source: Front Genet. 2021 Sep 24;12:751647. doi: 10.3389/fgene.2021.751647 (PMC8511958; doi:10.3389/fgene.2021.751647)
Supplement: Supplementary file 3 [file DataSheet3.xlsx]

## Sheet: Sheet1
		Virgins +RU486 vs Virgins -RU486								Mated +RU486 vs Mated -RU486
	metabolite	logFC	AveExpr	P.Value	FDR	METABOLIC.PATHWAY			metabolite	logFC	AveExpr	P.Value	FDR	METABOLIC.PATHWAY
Goes down with RU486								Goes down with RU486
	13-HODE (295.2 / 195.0)	-0.583591	18.6101	0.00206839	0.0290673	Lipids/phospholipids, ligand			Azelaic Acid (187.0 / 125.0)	-0.620913	19.8597	0.0080472	0.045984	Fatty acid metabolism
	3-Hydroxykynurenine (225.2 / 110.1)	-1.11618	17.0527	5.0963e-06	0.000305778	Tryptophan Cycle			cGMP (344.0 / 150.0)	-1.70386	18.8982	0.00377732	0.0302186	Nucleotide/Purine metabolism
	Allantoin (157.0 / 114.0)	-0.858403	21.4529	0.00218005	0.0290673	Nucleotide Degredation			Hydroxyproline/Aminolevulinate (132.1 / 86.2)	-1.75272	17.2361	3.60602e-06	0.000432722	Amino acids metabolism/Pro
	Choline (104.1 / 60.0)	-0.204121	26.2543	0.00318094	0.0347011	Vitamins			Kynurenate (188.0 / 143.8)	-0.724508	17.5219	0.00794321	0.045984	Amino Acid metabolism/Try
	Cytidine (244.0 / 112.1)	-0.62829	21.7729	0.000388274	0.0116482	Nucleotide/Pyrimidine metabolism			L-Kynurenine (209.1 / 94.0)	-0.897292	20.2894	0.000413021	0.00932062	Tryptophan Cycle
	Cytosine (112.1 / 95.0)	-0.669512	18.258	0.000317391	0.0116482	Nucleotide
	Hydroxyproline/Aminolevulinate (132.1 / 86.2)	-1.47364	17.2361	4.24907e-07	5.09888e-05	Amino acids metabolism/Pro
	Inositol (179.0 / 87.0)	-0.28209	20.0464	0.0055412	0.0451993	Glucose/inositol metabolism
	Lactose (341.0 / 59.0)	-0.454957	24.9003	0.00357042	0.0357042	Sugar/Galactose
	L-Kynurenine (209.1 / 94.0)	-0.640095	20.2894	0.000523732	0.0125696	Tryptophan Cycle
	Pentothenate (218.1 / 88.0)	-0.346499	23.8325	0.00106968	0.0183374	Amino acids metabolism/alanine, CoA
	Sarcosine (89.9 / 44.0)	-1.08605	18.1227	0.00454176	0.0419239	Amino Acid
	Sucrose (341.0 / 59.0 (2))	-0.449686	25.4161	0.00261921	0.0314305	Sugar
	Threonine (120.1 / 74.0 (2))	-0.46245	24.7927	0.0010102	0.0183374	Amino Acid
Goes up with RU486								Goes up with RU486
	AMP (346.1 / 79.0)	1.07291	21.2847	0.00564992	0.0451993	Nucleotide			1/3-Methylhistidine (170.0 / 96.0)	0.482627	19.5201	0.00766806	0.045984	Amino Acid (Histidine Metabolism)
									1-Methyladenosine (282.0 / 150.1)	0.520987	19.4228	0.00695335	0.045984	Nucleotide/Purine metabolism
									Acetylcarnitine (204.1 / 85.0)	0.981729	25.0345	2.87746e-05	0.00115099	Fatty acid metabolism
									Acetylcholine (146.1 / 87.0)	0.631085	19.3881	0.00011372	0.0034116	Lipids/phospholipids, ligand
									Adipic Acid (144.9 / 83.0)	1.22834	20.7632	0.00602839	0.0425534	Caprolactam degradation
									Alanine (90.0 / 44.0)	0.306559	26.5267	0.000466031	0.00932062	Amino Acid
									Betaine (118.0 / 58.0)	0.538381	23.0369	0.0025939	0.025939	Amino acids metabolism/Gly,Ser, Thr metabolism
									Carnitine (162.1 / 85.0)	0.555476	24.1798	0.00244984	0.025939	Amino acids metabolism/Lys
									Citrulline (174.0 / 131.0)	0.571352	19.6062	0.00139986	0.0205443	Urea Cycle
									gama-Aminobutyrate (102.1 / 56.0)	0.644999	16.579	0.00201093	0.0241311	Amino Acid metabolism/Ala, Glu, Asp
									Glutamic acid (148.1 / 84.0)	0.38444	25.4326	0.00302897	0.0279597	Amino Acid
									Glutaric Acid (131.0 / 87.0)	1.1111	20.17	0.00549503	0.0412127	Amino Acids/lys, trp, fatty acids
									Glyceraldehyde (89.0 / 59.0)	0.662602	22.0217	0.000938605	0.0160904	Sugar
									Glycerol-3-P (171.0 / 79.0)	1.90363	22.8635	0.00154082	0.0205443	Lipids/Glycerollipid
									Linolenic Acid (279.1 / 261.0)	0.431786	21.1235	0.00367726	0.0302186	Fatty acid metabolism
									Urate (167.0 / 124.0)	0.781166	24.0926	9.06337e-06	0.000543802	Nucleotide/Purine metabolism
		w[1118] X UAS-SP +RU486 vs w[1118] X UAS-SP -RU486								Dsx GAL4 X UAS-SP +RU486 vs Dsx GaL4 X UAS-SP -RU486
	metabolite	logFC	AveExpr	P.Value	FDR	METABOLIC.PATHWAY			metabolite	logFC	AveExpr	P.Value	FDR	METABOLIC.PATHWAY
Goes down with RU486								Goes down with RU486
	1/3-Methylhistidine (170.0 / 96.0)	-0.190893	19.6286	0.0100594	0.0258634	Amino Acid (Histidine Metabolism)			13-HODE (295.1 / 195.0)	-0.741584	16.993	5.2111e-07	3.52516e-06	Lipids/phospholipids, ligand
	13-HODE (295.1 / 195.0)	-0.312021	16.993	0.00376594	0.0117049	Lipids/phospholipids, ligand			1-Methyladenosine (282.2 / 150.1)	-0.754273	19.8648	1.18745e-06	7.1872e-06	Nucleotide/Purine metabolism
	3HBA (103.0 / 59.0)	-0.30691	17.6123	0.00374925	0.0117049	TCA Cycle			1-Methylguanosine (298.2 / 166.1)	-0.860602	18.8536	3.65224e-06	1.68003e-05	Nucleotide/Purine metabolism
	Asparagine (133.0 / 74.0)	-0.294961	20.9377	0.000226146	0.00123842	Amino Acid			3HBA (103.0 / 59.0)	-1.18831	17.6123	4.55446e-12	1.30941e-10	TCA Cycle
	Carnitine (162.0 / 85.0)	-0.350264	25.2048	1.60549e-05	0.000142024	Amino acids metabolism/Lys			Aminoisobutyrate (104.0 / 86.0)	-0.475317	14.9673	0.00163406	0.00384357	Amino acids metabolism/Val, Leu, iso-Leu
	Glutamic acid (148.0 / 84.0)	-0.383231	23.5697	8.0527e-06	7.71717e-05	Amino Acid			Asparagine (133.0 / 74.0)	-0.620197	20.9377	2.15324e-08	1.76874e-07	Amino Acid
	Glutamine (147.0 / 84.0)	-0.248504	24.9943	0.0109175	0.0267131	Amino Acid			Aspartic Acid (134.0 / 74.0)	-1.83135	16.2107	2.48005e-12	9.50687e-11	Amino Acid
	Guanosine (284.2 / 152.1)	-0.469366	22.3751	0.000958734	0.0040835	Nucleotide/Purine metabolism			Deoxycarnitine (147.0 / 87.0)	-0.751873	15.4773	4.51154e-06	1.92158e-05	Lipids/phospholipids, ligand
	Homoserine (120.0 / 74.0)	-0.319795	20.5606	0.000457228	0.00210325	Amino acids metabolism/Thr, Met, Asp			gama-Aminobutyrate (102.0 / 56.0)	-0.650792	14.7733	1.36646e-06	7.85712e-06	Amino Acid metabolism/Ala, Glu, Asp
	Inositol (179.0 / 87.0)	-0.163566	19.1303	0.022456	0.0487254	Glucose/inositol metabolism			Glutamic acid (148.0 / 84.0)	-0.537123	23.5697	7.28516e-07	4.65441e-06	Amino Acid
	L-Kynurenine (209.1 / 94.0)	-1.45904	16.5165	2.41275e-12	2.77466e-10	Tryptophan Cycle			Glutamine (147.0 / 84.0)	-0.864325	24.9943	3.14649e-09	3.28952e-08	Amino Acid
	Lysine (147.0 / 84.0 (2))	-0.311676	24.1237	0.000193605	0.00111323	Amino Acid			Glycerate (105.0 / 75.0)	-1.71788	21.8069	2.6406e-06	1.38032e-05	Amino Acid metabolism/Gly, Ser
	Margaric Acid (269.1 / 251.3)	-0.380656	19.592	1.82365e-06	2.33022e-05	Fatty acid metabolism			Homoserine (120.0 / 74.0)	-0.953799	20.5606	1.596e-11	2.62199e-10	Amino acids metabolism/Thr, Met, Asp
	Myristic Acid (227.1 / 209.0)	-0.393191	18.6983	8.29112e-05	0.00052971	Fatty acid metabolism			Inositol (179.0 / 87.0)	-0.588005	19.1303	2.12043e-08	1.76874e-07	Glucose/inositol metabolism
	Oxalacetate (131.0 / 113.0)	-0.205977	22.4294	0.00611329	0.0175757	Glycolysis			iso-Leucine (132.0 / 86.0 (2))	-0.489111	21.1762	0.000221607	0.000670652	Amino Acid
	Taurine (126.0 / 108.0)	-0.161528	20.8369	0.0101205	0.0258634	Amino acids metabolism/Sulfur metabolism			Kynurenic Acid (188.0 / 144.0)	-0.498915	18.7987	0.00980553	0.0203767	Tryptophan Cycle/Amino Acid metabolism
	Threonine (120.0 / 74.0 (2))	-0.325603	21.2649	0.000412252	0.00206126	Amino Acid			Lactose (341.0 / 59.0)	-0.459827	24.0362	3.99115e-05	0.000134995	Sugar/Galactose
									Leucine (132.0 / 86.0)	-0.405243	22.9667	0.00083657	0.00223734	Amino Acid
									Linolenic Acid (277.1 / 259.0)	-0.296497	17.1488	0.0065367	0.0147396	Fatty acid metabolism
									Lysine (147.0 / 84.0 (2))	-1.19617	24.1237	9.82438e-16	5.64902e-14	Amino Acid
									Margaric Acid (269.1 / 251.3)	-0.790228	19.592	9.58071e-12	2.15317e-10	Fatty acid metabolism
									Methionine (150.0 / 61.0)	-0.43872	19.5906	3.8907e-05	0.000134995	Amino Acid
									Myristic Acid (227.1 / 209.0)	-0.927163	18.6983	2.11526e-10	2.70283e-09	Fatty acid metabolism
									N2,N2-Dimethylguanosine (312.2 / 180.1)	-1.5272	16.898	5.73013e-08	4.3931e-07	Nucleotide/Purine metabolism
									Oxalacetate (131.0 / 113.0)	-0.64067	22.4294	6.26222e-09	6.00129e-08	Glycolysis
									Phenylalanine (166.0 / 120.0)	-0.427213	23.8138	0.000553276	0.00151492	Amino Acid
									Serine (106.0 / 60.0 (2))	-0.29525	22.3934	0.000380304	0.00106671	Amino Acid
									Threonine (120.0 / 74.0 (2))	-0.974666	21.2649	1.1234e-11	2.15317e-10	Amino Acid
									Tryptophan (205.1 / 146.0)	-0.295184	19.6829	0.00886447	0.0196041	Tryptophan Cycle
									Valine (118.0 / 72.0)	-0.40573	20.4844	0.000993879	0.00253991	Amino Acid
Goes up with RU486								Goes up with RU486
	8-Oxo-2'-deoxyguanosine (284.2 / 168.1)	0.374691	16.6475	0.00410534	0.0121055	Nucleotide/Purine metabolism			1/3-Methylhistidine (170.0 / 96.0)	0.3402	19.6286	0.000322601	0.000927477	Amino Acid (Histidine Metabolism)
	Aconitate (173.0 / 85.0)	0.379381	18.7556	1.76905e-07	2.54301e-06	TCA Cycle			8-Oxo-2'-deoxyguanosine (284.2 / 168.1)	0.81488	16.6475	3.21083e-06	1.53852e-05	Nucleotide/Purine metabolism
	Adipic Acid (144.9 / 83.0)	0.285434	16.6114	0.00406312	0.0121055	Caprolactam degradation			Acetylcarnitine (204.1 / 85.0)	1.12586	23.7197	2.68366e-07	1.92888e-06	Fatty acid metabolism
	Agmanite (131.0 / 72.0)	0.234522	16.1743	0.0112543	0.0269634	Polyamine Metabolism			Aconitate (173.0 / 85.0)	0.257027	18.7556	0.00116225	0.00290563	TCA Cycle
	Anthranilic Acid (136.0 / 118.0)	0.2141	15.3327	0.00751247	0.0205698	Amino Acid metabolism/Trp, Phe, Tyr			Adenine (134.0 / 107.0)	0.799166	20.1263	0.00140951	0.00344879	Nucleotide/Purine metabolism
	Arginine (175.0 / 70.0)	0.221194	26.7143	6.43121e-05	0.000435052	Amino Acid			Adenosine (268.2 / 136.1)	1.41418	21.486	5.12983e-05	0.00016387	Nucleotide/Purine metabolism
	Benzoic acid (121.0 / 77.0)	0.277879	23.216	4.01949e-05	0.000308161	Nicotinate and nicotinamide metabolism			AMP (346.1 / 79.0)	0.796224	21.073	0.0016377	0.00384357	Nucleotide
	Betaine (118.0 / 58.0)	0.725422	25.0978	5.16345e-08	9.89662e-07	Amino acids metabolism/Gly,Ser, Thr metabolism			Betaine (118.0 / 58.0)	0.717842	25.0978	3.11566e-06	1.53852e-05	Amino acids metabolism/Gly,Ser, Thr metabolism
	Cadaverine (103.0 / 86.0)	0.179483	17.0598	0.0221358	0.0487254	Amino Acid			Carnitine (162.0 / 85.0)	0.236913	25.2048	0.00971109	0.0203767	Amino acids metabolism/Lys
	cGMP (344.0 / 150.0)	0.450516	19.7486	0.00356919	0.0117049	Nucleotide/Purine metabolism			cGMP (344.0 / 150.0)	0.487666	19.7486	0.00909193	0.0197278	Nucleotide/Purine metabolism
	Citrulline (174.0 / 131.0)	0.376422	17.1554	0.00129495	0.00513514	Urea Cycle			D-GA3P (167.0 / 97.0)	0.72735	18.032	3.97873e-05	0.000134995	Glycolysis/Glycogenesis
	D-Leucic Acid (131.0 / 85.0)	0.40001	18.4002	0.0184922	0.0416981	Amino Acid metabolism/Leu			DHAP (167.0 / 79.0 (2))	0.803949	16.1662	6.63757e-05	0.000206303	Glycolysis/Glycogenesis
	Fumaric Acid (115.0 / 71.0)	0.233838	19.3662	0.00165743	0.00635349	TCA Cycle			Epinephrine/Normetanephrine (184.1 / 166.1)	3.90139	19.9491	1.0895e-17	1.25292e-15	Amino Acid metabolism/Tyr,ligand
	G1P/G6P/F6P/F1P (259.0 / 97.0)	0.618078	22.6757	0.00372211	0.0117049	Glycolysis			G1P/G6P/F6P/F1P (259.0 / 97.0)	0.884002	22.6757	0.000861702	0.00225218	Glycolysis
	Geranyl Pyrophosphate (313.1 / 79.1)	0.286037	16.7978	0.00957933	0.0256191	Ubiquinone and other terpenoid-quinone biosynthesis			Geranyl Pyrophosphate (313.1 / 79.1)	0.683967	16.7978	4.33569e-06	1.91771e-05	Ubiquinone and other terpenoid-quinone biosynthesis
	Glucose (179.0 / 89.0)	0.624924	26.2778	9.68838e-11	2.78541e-09	Glycolysis/sugar			GMP (364.1 / 152.0)	1.17824	20.7492	1.11111e-05	4.25927e-05	Nucleotide/Purine metabolism
	Glutaric Acid (131.0 / 87.0)	0.261025	18.223	0.00266798	0.00958804	Amino Acids/lys, trp, fatty acids			Histamine (112.0 / 95.0 (2))	0.171446	22.7451	0.0130959	0.0264216	Nucleotide
	Glyceraldehyde (89.0 / 59.0)	0.597318	21.5548	9.1049e-11	2.78541e-09	Sugar			IMP (347.1 / 79.0)	1.40644	20.3276	2.05746e-06	1.12671e-05	Nucleotide/Purine metabolism
	Histidine (156.0 / 110.0)	0.246367	26.8347	4.47836e-05	0.000321882	Amino Acid			Inosine (269.2 / 137.1)	0.453368	25.548	1.906e-05	7.07066e-05	Nucleotide/Purine metabolism
	Inosine (269.2 / 137.1)	0.201281	25.548	0.0118731	0.0275293	Nucleotide/Purine metabolism			lactate (89.0 / 43.0)	0.519835	21.7072	0.00646465	0.0147396	Glycolysis/TCA
	lactate (89.0 / 43.0)	0.573961	21.7072	0.000384249	0.00200858	Glycolysis/TCA			Malonic Acid (103.0 / 41.0)	0.587639	16.881	4.9557e-05	0.00016283	TCA Cycle
	Lactose (341.0 / 59.0)	0.746337	24.0362	2.47338e-11	1.42219e-09	Sugar/Galactose			Orotate (155.0 / 111.0)	1.42313	17.487	0.00992256	0.0203767	Nucleotide/Pyrimidine metabolism
	Malate (133.0 / 115.0)	0.626963	22.1743	0.00101871	0.00418397	TCA Cycle			Pentothenate (218.1 / 88.0)	0.229525	23.4986	0.0212731	0.0421793	Amino acids metabolism/alanine, CoA
	Mevalonate (147.0 / 59.0)	0.655148	15.0858	0.00319519	0.0111347	Terpenoid backbone biosynthesis			PEP (167.0 / 79.0)	1.73324	17.8682	2.78152e-10	3.19874e-09	Glycolosis
	N-AcetylGlycine (116.0 / 74.0)	0.263109	17.4387	0.000112904	0.000683366	Amino Acid metabolism			Ribose-5-P (229.0 / 79.0)	0.657353	21.8343	0.000246437	0.000726674	Pentose phosphate pathway
	Niacinamide (123.0 / 80.0)	0.444549	16.8103	2.95765e-05	0.000242949	Vitamins			Tryptamine (161.0 / 144.0)	0.282766	16.3082	0.0228958	0.0446274	Amino Acid
	Ornithine (133.0 / 70.0)	0.547325	18.8625	1.90719e-10	4.38653e-09	Urea cycle			UDP-GlcNAc (606.0 / 385.0)	1.30512	19.73	2.64088e-11	3.79626e-10	Amino sugar and nucleotide sugar metabolism
	Proline (116.0 / 70.0)	0.215469	23.5826	0.000761049	0.00336618	Amino Acid			Urate (167.0 / 124.0)	0.787716	23.2481	8.14711e-06	3.23075e-05	Nucleotide/Purine metabolism
	Putrescine (89.0 / 72.0)	0.736552	15.9543	4.70845e-06	4.92247e-05	Polyamine Metabolism			Xanthosine (283.1 / 151.0)	0.890583	20.4173	7.13762e-06	2.93152e-05	Nucleotide/Purine metabolism
	Pyruvate (87.0 / 43.0)	0.653257	24.0396	3.24033e-06	3.72638e-05	Glycolysis/amino acids metabolism
	Quinolinic Acid (168.0 / 150.0)	0.16686	18.9579	0.0119693	0.0275293	Amino Acid/ Tryptophan, bela alanine metabolism
	Sorbitol (181.0 / 89.0)	0.458026	19.2073	0.000439836	0.00210325	Sugar
	Tryptamine (161.0 / 144.0)	0.642567	16.3082	7.74199e-08	1.2719e-06	Amino Acid
	Tyramine (138.0 / 121.0)	0.173118	22.7577	0.00235631	0.00874115	Amino Acid
	UDP-GlcNAc (606.0 / 385.0)	0.328596	19.73	0.00748192	0.0205698	Amino sugar and nucleotide sugar metabolism
	Xanthurenic Acid (204.1 / 160.0)	0.177255	18.3402	0.0103514	0.0258786	Tryptophan Cycle/Amino Acid metabolism
	Note: Bold font indicate metabolites in common between +/-RU486 virgin and mated, or between +/-RU486 w[1118] X UAS-SP and Dsx GAL4 X UAS-SP
